# Supplementary material for: Spatial and functional separation of mTORC1 signalling in response to different amino acid sources
Source: Springer Nature journal article supplement (doi:10.1038/s41556-024-01523-7), 2024-10-09

Uncropped blots for Fig. 6a

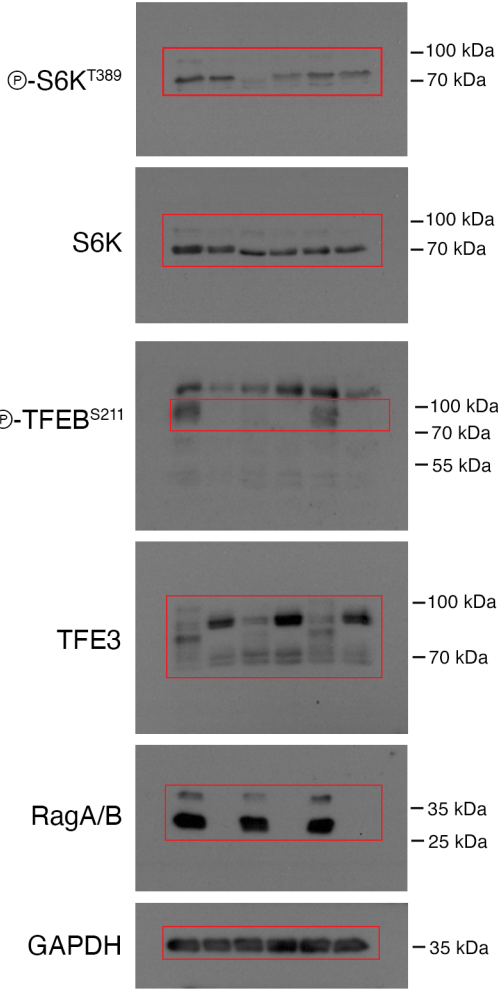

Uncropped blots for Fig. 6b

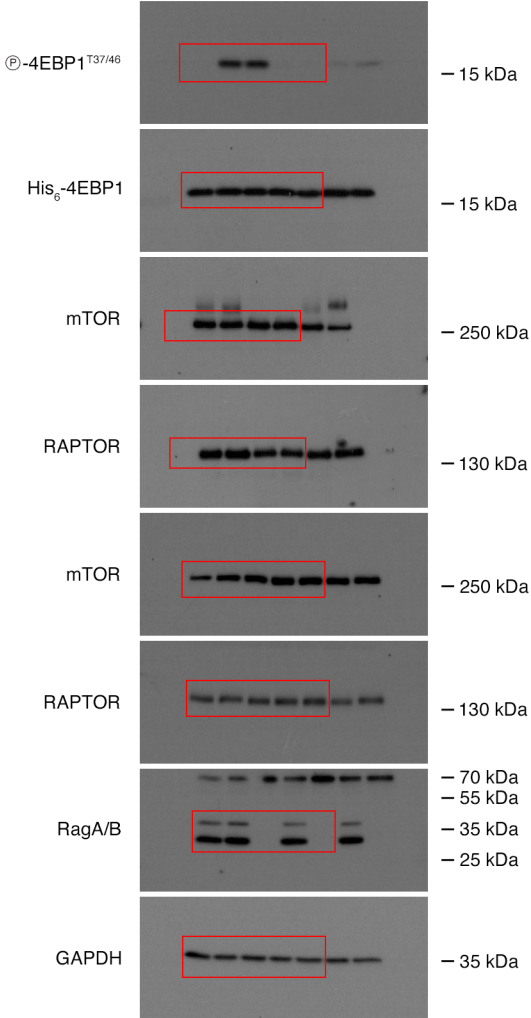

Uncropped blots for Fig. 6c

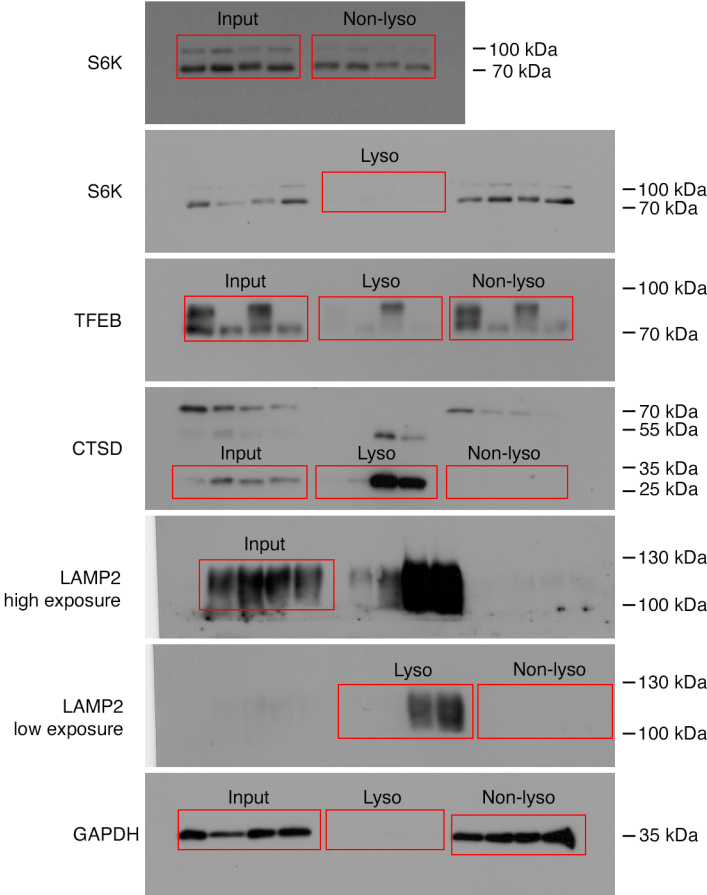

Uncropped blots for Fig. 6d

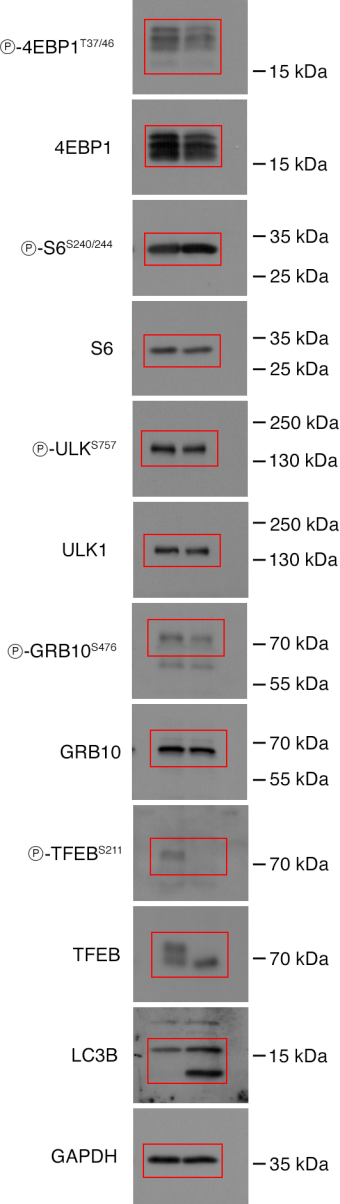

Uncropped blots for Fig. 6e

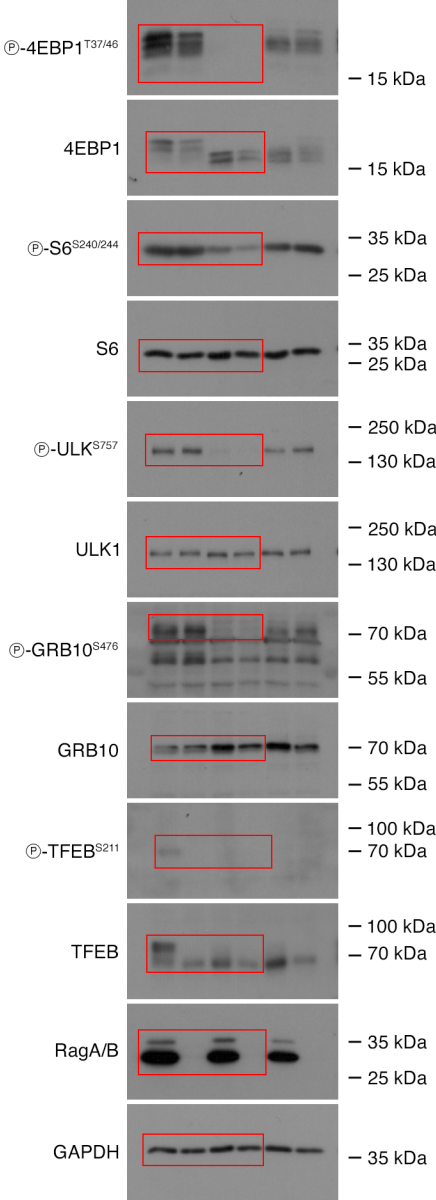

Uncropped blots for Fig. 6f

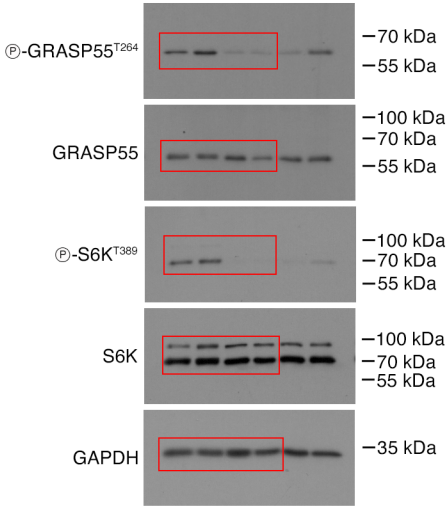

Uncropped blots for Fig. 6g

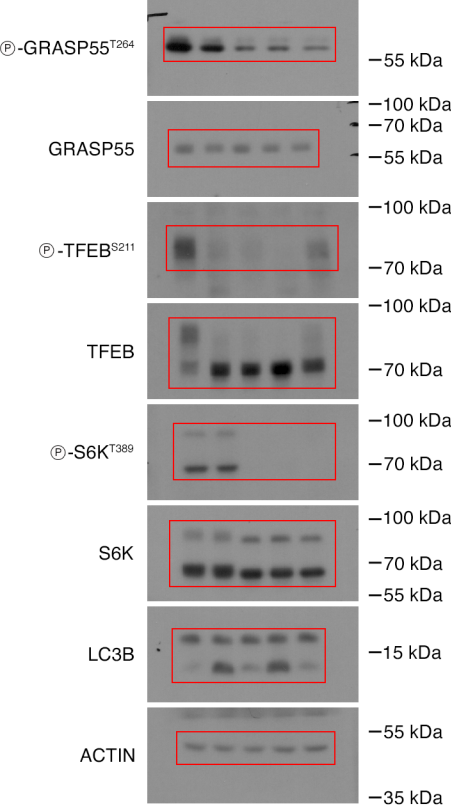

**Uncropped blots for Fig. 6h**

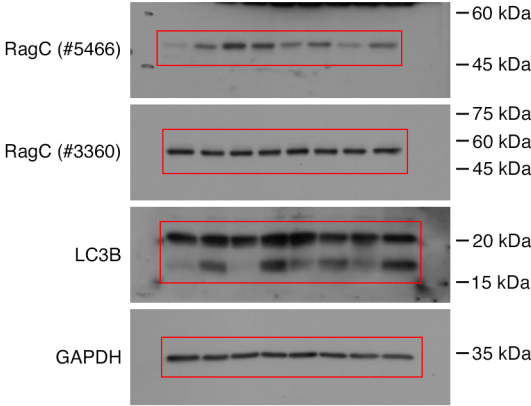

Supplement: 41556_2024_1523_MOESM8_ESM.pdf [file 41556_2024_1523_MOESM8_ESM.pdf]
