# Supplementary material for: Spatial and functional separation of mTORC1 signalling in response to different amino acid sources
Source: Springer Nature journal article supplement (doi:10.1038/s41556-024-01523-7), 2024-10-09

Uncropped blots for Extended Data Fig. 4a

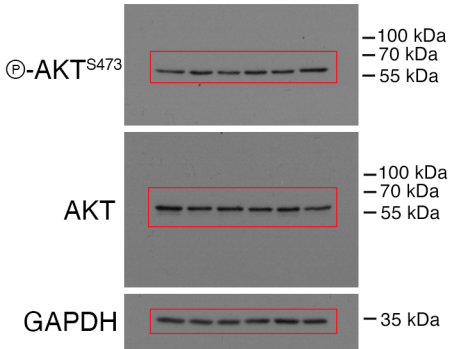

Uncropped blots for Extended Data Fig. 4b

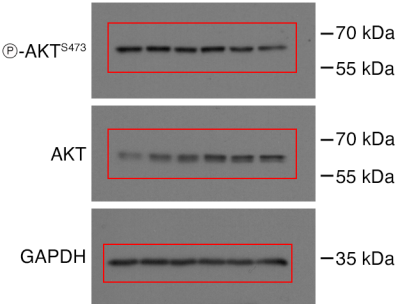

Uncropped blots for Extended Data Fig. 4c

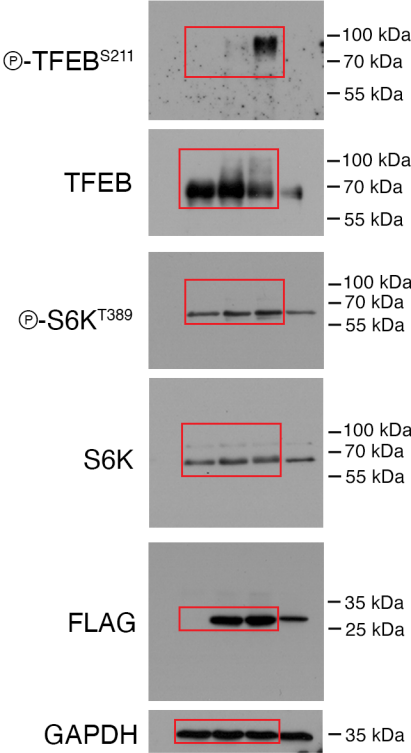

Supplement: 41556_2024_1523_MOESM13_ESM.pdf [file 41556_2024_1523_MOESM13_ESM.pdf]
