# Supplementary material for: Spatial and functional separation of mTORC1 signalling in response to different amino acid sources
Source: Springer Nature journal article supplement (doi:10.1038/s41556-024-01523-7), 2024-10-09

Uncropped blots for Extended Data Fig. 7a

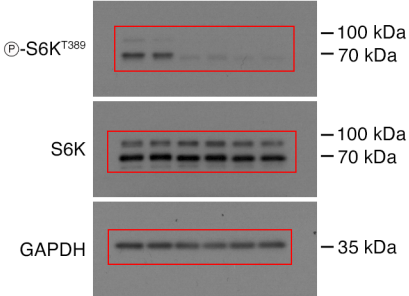

Uncropped blots for Extended Data Fig. 7b

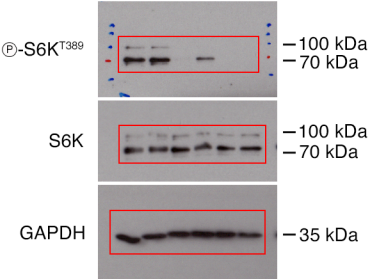

Uncropped blots for Extended Data Fig. 7c

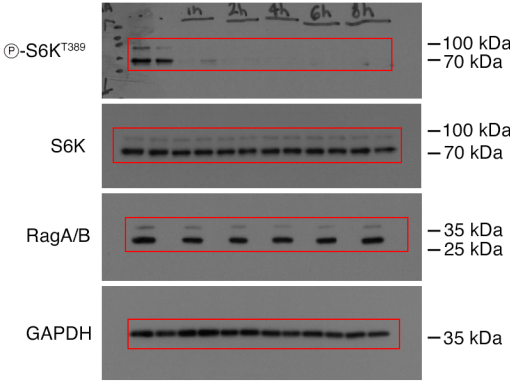

Uncropped blots for Extended Data Fig. 7d

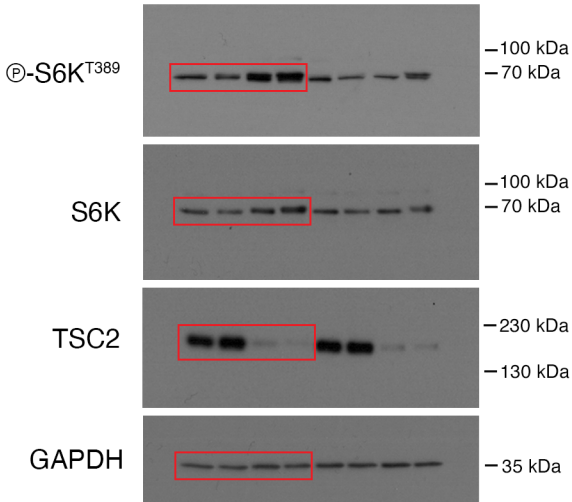

Uncropped blots for Extended Data Fig. 7e

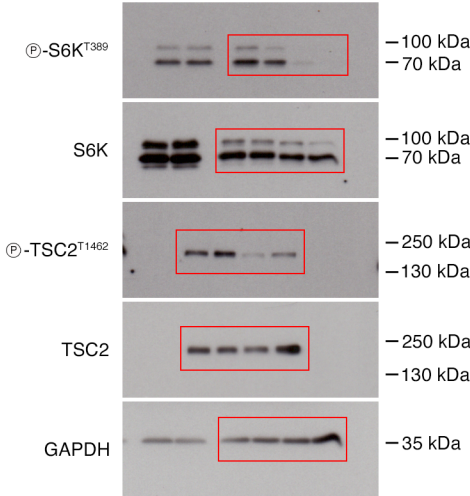

Uncropped blots for Extended Data Fig. 7f

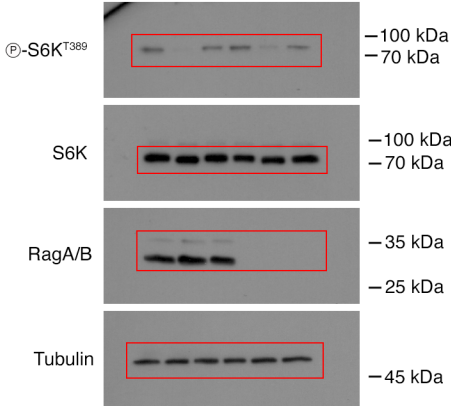

Uncropped blots for Extended Data Fig. 7g

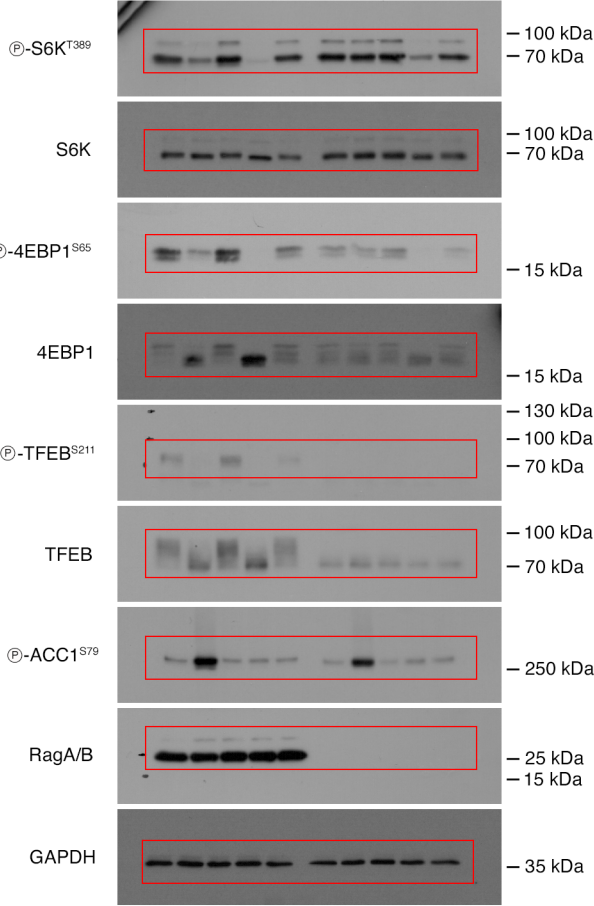

Supplement: 41556_2024_1523_MOESM16_ESM.pdf [file 41556_2024_1523_MOESM16_ESM.pdf]
